# Supplementary material for: Molecular relationships of the Israeli shrews (Eulipotyphla: Soricidae) based on cytochromebsequences
Source: publisher site journal article supplement (doi:10.1515/mammalia-2019-0143), 2020-08-17
Supplement: Supplementary file 1 [file j_mammalia-2019-0143_suppl_001.docx]

**Supplementary figures**

**Molecular relationships of the Israeli shrews ([Eulipotyphla](https://en.wikipedia.org/wiki/Eulipotyphla): Soricidae)** **based on cytochrome-*b* sequences**

Erez Shpirer, Michal Haddas-Sasson, Maya Spivak-Glater, Tamar Feldstein, Shai Meiri, Dorothée Huchon


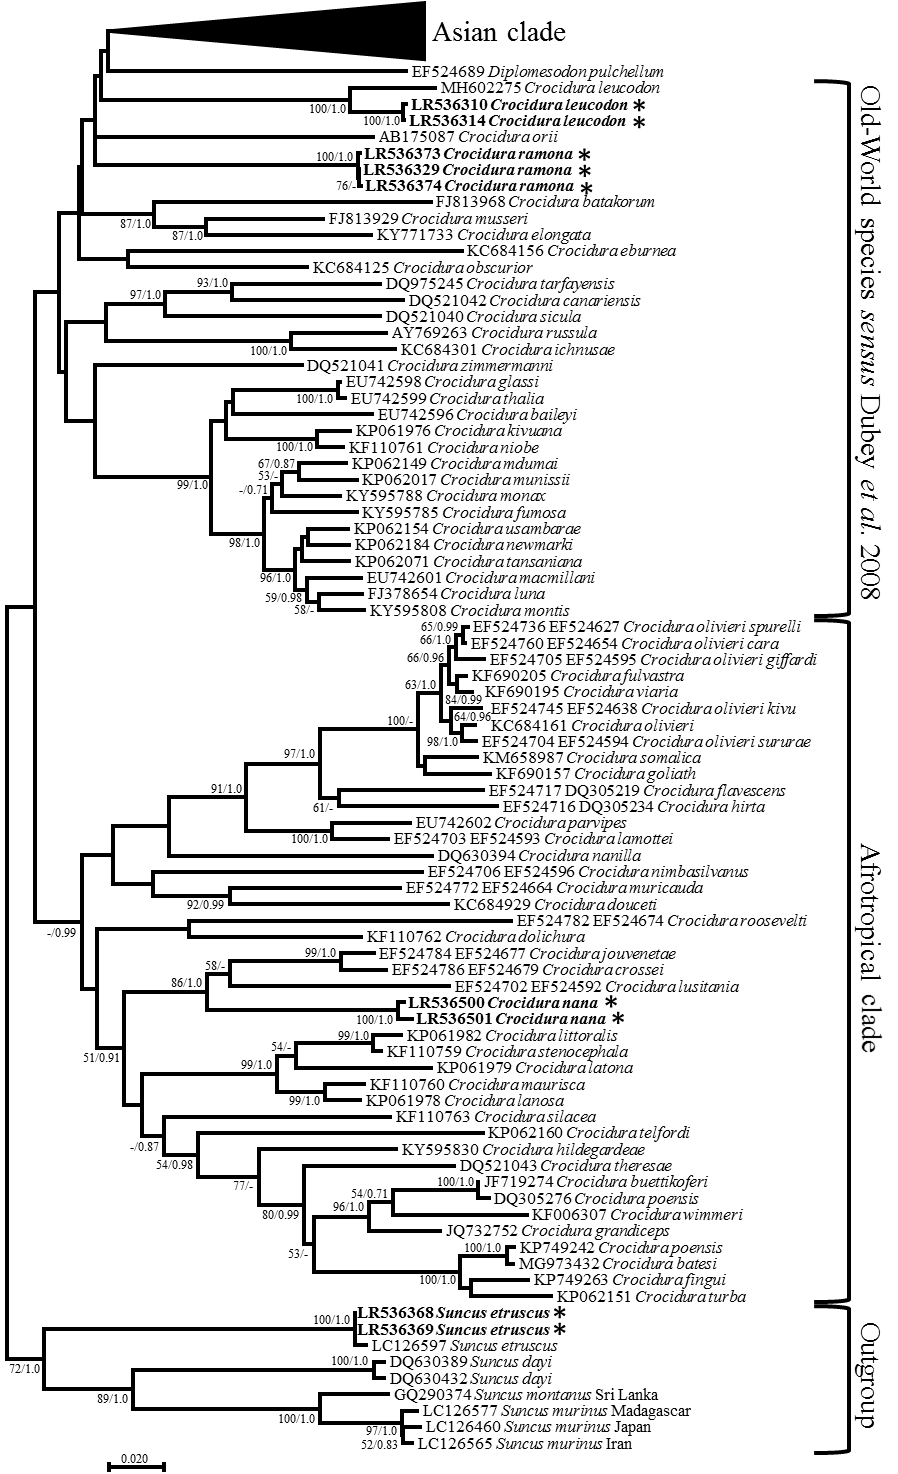


**Supplementary Figure S1.** Legend on next page.

**Supplementary Figure S1. Maximum likelihood tree of *Crocidura cytb* sequences with emphasis on the Afrotropical clade.** Phylogenetic relationships inferred from a matrix of 1,128 nucleotide positions for 131 individuals. Maximum likelihood bootstrap supports above 50% and Bayesian posterior probabilities above 0.70 are indicated near the corresponding node separated with a slash. Sequences obtained in this work are indicated in bold. Clade names follow [Dubey et al. (2008](#_ENREF_1)).


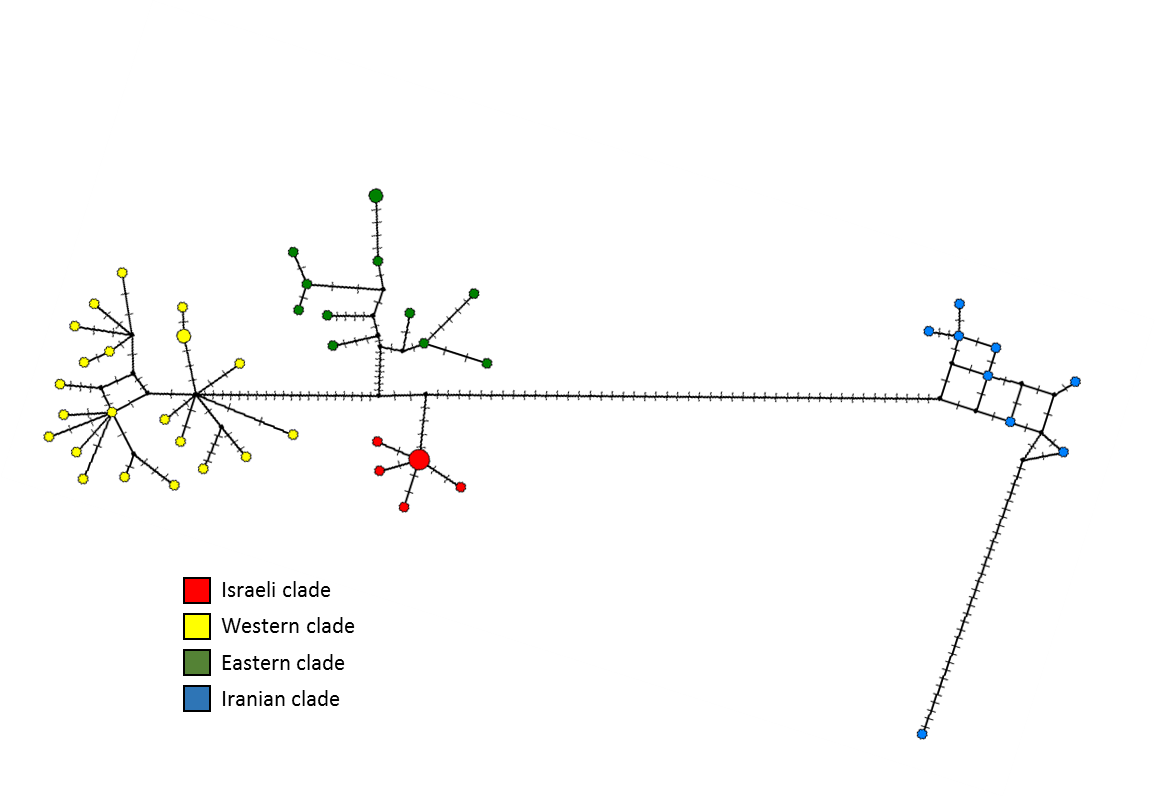


**Supplementary Figure S2. *Crocidura leucodon* median joining network of Cytochome *b* haplotypes**. Each circle corresponds to a different haplotype, and its size is proportional to the corresponding haplotype frequency. The smaller circles correspond to a single haplotype. Missing intermediates are indicated by small solid circles.  Tick marks along each branch designate the number of base differences among haplotypes.


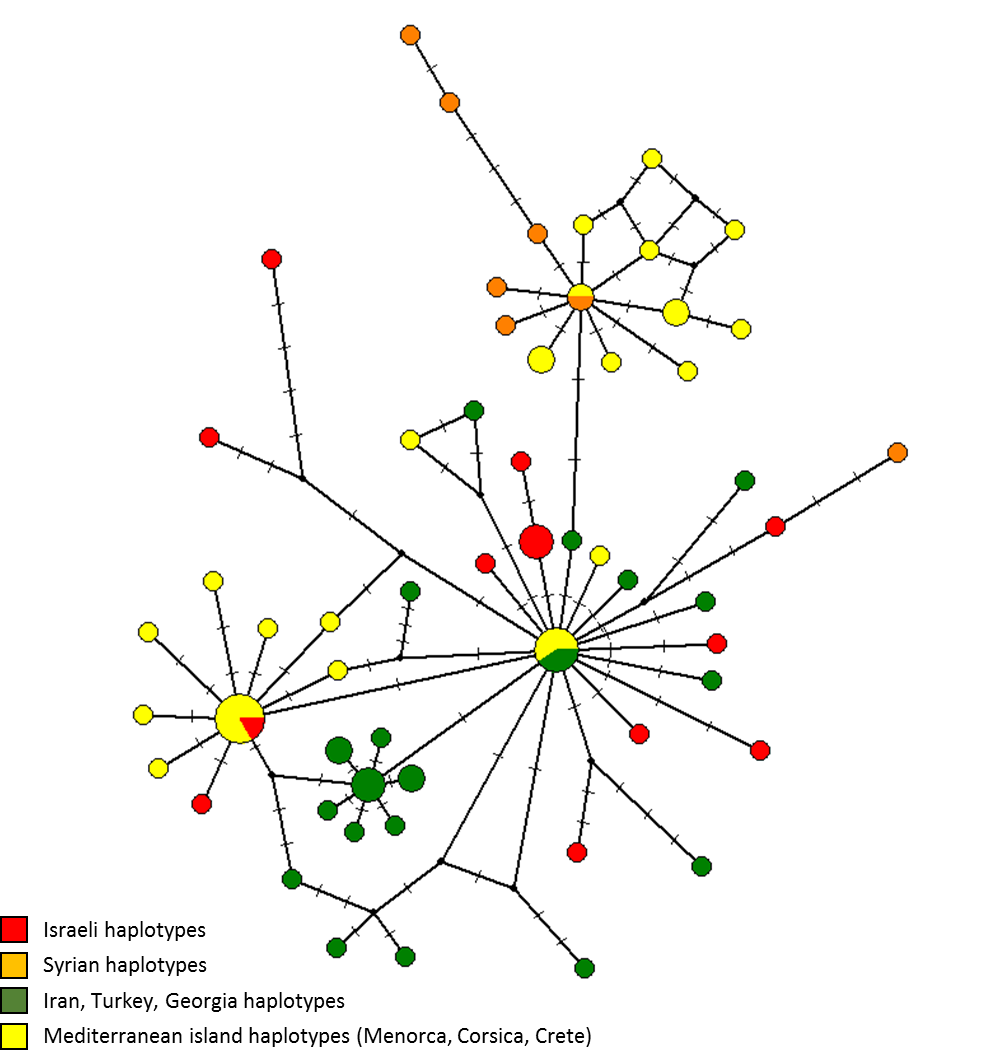


**Supplementary Figure S3. *Crocidura gueldenstaedtii* median joining network of Cytochome *b* haplotypes**. Each circle corresponds to a different haplotype, and its size is proportional to the corresponding haplotype frequency. The smaller circles correspond to a single haplotype. Missing intermediates are indicated by small solid circles.  Tick marks along each branch designate the number of base differences among haplotypes.


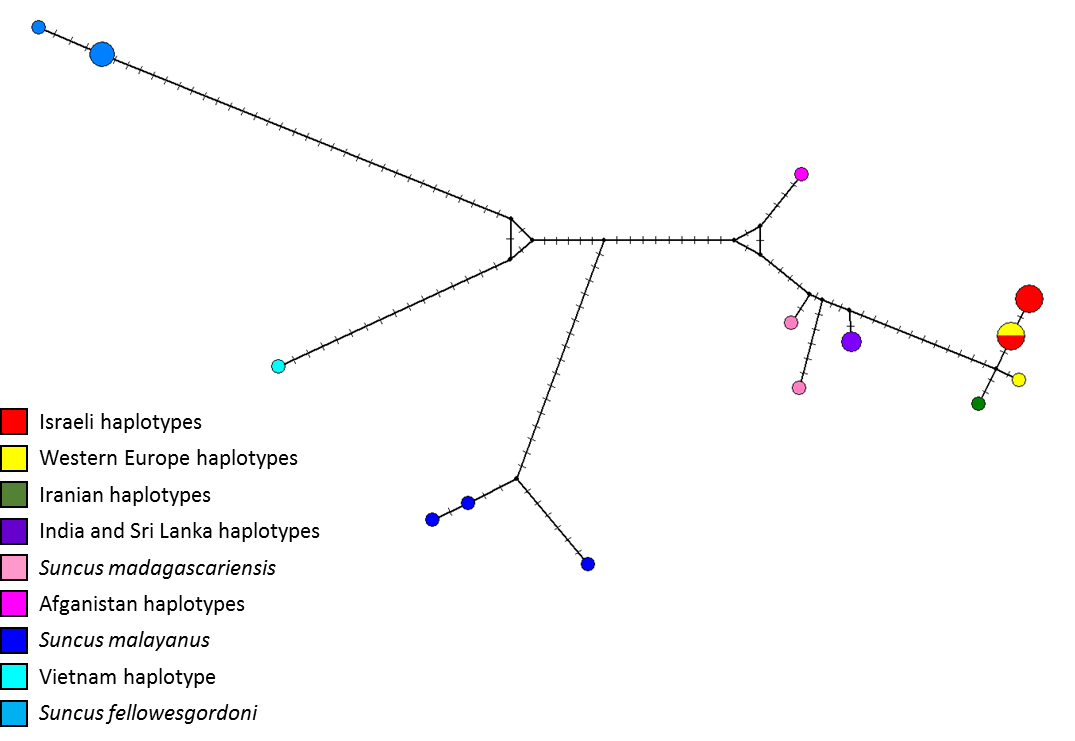


**Supplementary Figure S4. *Suncus etruscus* median joining network of Cytochome *b* haplotypes**. Each circle corresponds to a different haplotype, and its size is proportional to the corresponding haplotype frequency. The smaller circles correspond to a single haplotype. Missing intermediates are indicated by small solid circles.  Tick marks along each branch designate the number of base differences among haplotypes.

**References**

Dubey, S., Salamin, N., Ruedi, M., Barriere, P., Colyn, M. & Vogel, P. 2008. Biogeographic origin and radiation of the Old World crocidurine shrews (Mammalia: Soricidae) inferred from mitochondrial and nuclear genes. *Mol. Phylogenet. Evol.* 48(3): 953-963.
