# Supplementary material for: Molecular relationships of the Israeli shrews (Eulipotyphla: Soricidae) based on cytochromebsequences
Source: publisher site journal article supplement (doi:10.1515/mammalia-2019-0143), 2020-08-17
Supplement: Supplementary file 2 [file j_mammalia-2019-0143_suppl_002.docx]

**Supplementary Tables**

**Molecular relationships of the Israeli shrews (**[**Eulipotyphla**](https://en.wikipedia.org/wiki/Eulipotyphla)**: Soricidae)** **based on cytochrome-*b* sequences**

Erez Shpirer, Michal Haddas-Sasson, Maya Spivak-Glater, Tamar Feldstein, Shai Meiri, Dorothée Huchon

**Supplementary Table S1: Samples used in the phylogenetic analyses.** Skin samples are indicated by a *. All other samples were preserved in ethanol.

| **Accession** | **Species** | **Voucher1** | **Locality** | **Date** | **GPSN** | **GPSE** |
| --- | --- | --- | --- | --- | --- | --- |
| LR536310 | *Crocidura leucodon** | TAUM4909 | Beit-Hashita | 26/01/1970 | 32.55 | 35.43 |
| LR536311 | *Crocidura leucodon** | TAUM5944 | Hermon Mountain | 03/08/1971 | 33.40 | 35.83 |
| LR536312 | *Crocidura leucodon* | TAUM11453 | Hashfela | 01/03/2003 | 31.60 | 34.89 |
| LR536313 | *Crocidura leucodon* | TAUM11494 | Yehuda Mountains | 24/03/2006 | 31.71 | 35.07 |
| LR536314 | *Crocidura leucodon* | TAUM11798 | Hashfela | 01/03/2002 | 31.63 | 34.92 |
| LR536315 | *Crocidura leucodon* | TAUM12431 | Yavniel | 02/04/2010 | 32.72 | 35.50 |
| LR536366 | *Crocidura leucodon* | TAUM12526 | Bashani Ridge | 03/11/2010 | - | - |
| LR536316 | *Crocidura leucodon* | TAUM12532 | Tavor | 12/02/2010 | 32.69 | 35.39 |
| LR536317 | *Crocidura gueldenstaedtii* | TAUM11502 | Givat Yeshayahu | 23/03/2006 | 33.01 | 35.23 |
| LR536372 | *Crocidura gueldenstaedtii* | TAUM11507 | Yehuda Mountains | 13/05/2006 | 31.71 | 35.07 |
| LR536318 | *Crocidura gueldenstaedtii* | TAUM11569 | East of Tel Goded | 01/01/2003 | 31.66 | 34.92 |
| LR536319 | *Crocidura gueldenstaedtii* | TAUM11604 | Upper Galilee | 24/03/2007 | 33.01 | 35.23 |
| LR536320 | *Crocidura gueldenstaedtii* | TAUM11610 | Ein Yaaqov | 24/03/2007 | 33.01 | 35.23 |
| LR536321 | *Crocidura gueldenstaedtii* | TAUM11782 | Adulam | 03/01/2002 | 31.63 | 34.92 |
| LR536322 | *Crocidura gueldenstaedtii* | TAUM11783 | Adulam | 03/01/2002 | 31.63 | 34.92 |
| LR536323 | *Crocidura gueldenstaedtii* | TAUM11951 | Upper Galilee | 15/05/2007 | 32.98 | 35.48 |
| LR536367 | *Crocidura gueldenstaedtii* | TAUM12207 | Nahal Neder | 02/05/2009 | - | - |
| LR536324 | *Crocidura gueldenstaedtii* | TAUM12465 | Nahal Besor | 18/04/2010 | 31.19 | 34.57 |
| LR536325 | *Crocidura gueldenstaedtii* | TAUM12559 | Zivon | 31/01/2011 | 33.03 | 35.42 |
| LR536326 | *Crocidura gueldenstaedtii* | TAUM12603 | Kinneret | 21/04/2011 | 32.72 | 35.56 |
| LR536500 | *Crocidura nana* | 187133WTS6668 | Tanzania, Lemiyon area | 06/07/2005 | - | - |
| LR536501 | *Crocidura nana* | 187133WTS6668 | Tanzania, Lemiyon area | 07/07/2005 | - | - |
| LR536327 | *Suncus etruscus* | TAUM11646 | Lahay | 09/11/2009 | 31.38 | 34.87 |
| LR536328 | *Suncus etruscus* | TAUM12436 | Yavniel | 04/04/2010 | 32.72 | 35.50 |
| LR536371 | *Suncus etruscus* | TAUM14251 | Maktesh Ramon | 2010 | 30.63 | 34.83 |
| LR536368 | *Suncus etruscus* | TAUM14396 | Nahal Timarim | 17/03/2015 | - | - |
| LR536369 | *Suncus etruscus* | TAUM14397 | Nahal Timarim | 17/03/2015 | - | - |
| LR536370 | *Suncus etruscus* | TAUM14402 | Nahal Timarim | 26/03/2015 | - | - |
| LR536373 | *Crocidura ramona** | TAUM9342 | Maktesh Ramon | 01/04/1995 | 30.63 | 34.83 |
| LR536329 | *Crocidura ramona** | TAUM9343 | Maktesh Ramon | 01/04/1995 | 30.63 | 34.83 |
| LR536374 | *Crocidura ramona* | TAUM12771 | Samar Sands | 15/09/2011 | 29.81 | 35.03 |

1 Voucher number is for the Steinhardt Museum of Natural History and The National Research Center at Tel Aviv University (Israel), except for *C. nana* which is for The Field Museum of Natural History (Chicago, USA).

**Supplementary Table S2. List of primers used in PCR amplification and sequencing. Forward and reverse primers are indicated by For and Rev respectively**.

| **Primer** | **Primer sequence 5' - 3'** | **Used with Accession1** |
| --- | --- | --- |
| D1 (For) | gtntaaccacgacytatgacatgaa | All sequences except TAUM14396,  TAUM14397,  TAUM14402 |
| R1 (Rev) | gctttgggtgctgatggtggg | All sequences except TAUM14396,  TAUM14397,  TAUM14402 |
| D2 (For) | gacctatgacatgaaaaatcatygttg | LR536310 LR536311 LR536313 LR536314 LR536315 LR536366 LR536316 LR536317 LR536372 LR536318 LR536319 LR536320 LR536321 LR536322 LR536323 LR536367 LR536324 LR536325 LR536326 LR536501 LR536327 LR536371 LR536373 LR536329 |
| R2 (Rev) | tctccgtttctggtttacaagac | LR536310 LR536312 LR536312 LR536313 LR536314 LR536315 LR536366 LR536316 LR536317 LR536372 LR536318 LR536319 LR536320 LR536321 LR536322 LR536323 LR536367 LR536324 LR536325 LR536326 LR536501 LR536328 LR536329 |
| DA (For) | gayaaagcyaccytracycg | LR536328 LR536371 LR536329 |
| RA (Rev) | ggtggtgtrttragrggrTT | LR536500 LR536501 LR536328 LR536329 |
| DB (For) | cchttycaCccttaYTayac | LR536311 LR536312 LR536316 LR536500 LR536501 LR536329 |
| RB (Rev) | GCNGTRTGGAGRAGTGGRAT | LR536311 |
| DC (Rev) | CcYaataaactYggaggRgt | LR536311 LR536328 |
| DD (For) | gtrggacgaggaytytayta | LR536501 LR536329 |
| RD (Rev) | GCsGCTACaATrAAkGGrAG | LR536328 LR536329 |
| DE (For) | gcyatacaCtayacatcNga | LR536311 LR536328 LR536329 |
| RE (Rev) | GGTDGCTATAACTGcrAATAA | LR536311 LR536314 LR536315 LR536500 LR536501 LR536327 LR536373 LR536329 |
| RB2 (Rev) | GGTGTTCTAGCTCTCATCTTAT | LR536327 LR536371 LR536329 |
| DC2 (For) | CcTaaCaaGctCggaggTgt | LR536329 |
| D3 (For) | ggattctctgtcgacaaagcyac | LR536317 LR536372 LR536318 LR536320 LR536321 LR536322 LR536323 LR536367 LR536326 LR536500 |
| R3 (Rev) | cgggttagggtagctttrtc | LR536317 LR536318 LR536319 LR536320 LR536321 LR536322 LR536323 LR536324 LR536325 LR536326 LR536500 LR536328 |
| Lasi-DA | ACTCGCTTCTTCGCATTyCA | LR536310 LR536311 |
| Lasi-RA (Rev) | GGTGTATTGAGAGGGTTAGC | LR536310 LR536311 |
| Lasi-DD (For) | CGAGGATTCTACTATGGCTC | LR536311 |
| Lasi-RD (Rev) | TGTAGGAATAATAGGTGTACTCC | LR536311 |
| Lasi-RC (Rev) | ATTTGTACTACTAAGGCTCTG | LR536311 |
| D60 (For) | ACCAATGACATGAAAAATCATngt | TAUM14396 TAUM14397 TAUM14402 |
| R1270 (Rev) | TCTCCATTTCTGGTTTACAAGAC | TAUM14396 TAUM14397 TAUM14402 |

1 for species of each accession number see Table S1.

**Supplementary Table S3. Accession numbers of the sequences used in Figure 2 and Supplementary Figure S1 and references.**

| **Accession** | **Taxon** | **Reference** |
| --- | --- | --- |
| AB077072 | *Crocidura lasiura* | ([Ohdachi et al. 2004](#_ENREF_42)) |
| AB077074 | *Crocidura watasei* | ([Ohdachi et al. 2004](#_ENREF_42)) |
| AB175083 | *Crocidura attenuata* | ([Ohdachi et al. 2006](#_ENREF_41)) |
| AB175087 | *Crocidura orii* | ([Ohdachi et al. 2006](#_ENREF_41)) |
| AY769263 | *Crocidura russula* | ([Fontanillas et al. 2005](#_ENREF_24)) |
| AY843486 | *Crocidura sibirica* | ([Dubey et al. 2006](#_ENREF_19)) |
| AY843499 | *Crocidura monacha* | ([Dubey et al. 2006](#_ENREF_19)) |
| AY843500 | *Crocidura gueldenstaedtii* | ([Dubey et al. 2006](#_ENREF_19)) |
| AY925211 | *Crocidura zarudnyi* | ([Dubey et al. 2007d](#_ENREF_16)) |
| DQ305276 | *Crocidura poensis* | ([Dubey et al. 2007a](#_ENREF_12)) |
| DQ521040 | *Crocidura sicula* | ([Dubey et al. 2007d](#_ENREF_16)) |
| DQ521041 | *Crocidura zimmermanni* | ([Dubey et al. 2007d](#_ENREF_16)) |
| DQ521042 | *Crocidura canariensis* | ([Dubey et al. 2007d](#_ENREF_16)) |
| DQ521043 | *Crocidura theresae* | ([Dubey et al. 2007d](#_ENREF_16)) |
| DQ630381 | *Crocidura malayana* | ([Dubey et al. 2007e](#_ENREF_17)) |
| DQ630382 | *Crocidura neglecta* | ([Dubey et al. 2007e](#_ENREF_17)) |
| DQ630384 | *Crocidura nigripes* | ([Dubey et al. 2007e](#_ENREF_17)) |
| DQ630389 | *Suncus dayi* | ([Dubey et al. 2007e](#_ENREF_17)) |
| DQ630394 | *Crocidura nanilla* | ([Dubey et al. 2007e](#_ENREF_17)) |
| DQ630432 | *Suncus dayi* | ([Dubey et al. 2007e](#_ENREF_17)) |
| DQ975245 | *Crocidura tarfayensis* | ([Dubey et al. 2008a](#_ENREF_15)) |
| EF524689 | *Diplomesodon pulchellum* | ([Dubey et al. 2008b](#_ENREF_18)) |
| EF524702 EF524592 | *Crocidura lusitania* | ([Dubey et al. 2008b](#_ENREF_18)) |
| EF524703 EF524593 | *Crocidura lamottei* | ([Dubey et al. 2008b](#_ENREF_18)) |
| EF524704 EF524594 | *Crocidura olivieri sururae* | ([Dubey et al. 2008b](#_ENREF_18)) |
| EF524705 EF524595 | *Crocidura olivieri giffardi* | ([Dubey et al. 2008b](#_ENREF_18)) |
| EF524706 EF524596 | *Crocidura nimbasilvanus* | ([Dubey et al. 2008b](#_ENREF_18)) |
| EF524716 DQ305234 | *Crocidura hirta* | ([Dubey et al. 2007a](#_ENREF_12); [Dubey et al. 2008b](#_ENREF_18)) |
| EF524717 DQ305219 | *Crocidura flavescens* | ([Dubey et al. 2008b](#_ENREF_18)) ([Dubey et al. 2007a](#_ENREF_12)) |
| EF524736 EF524627 | *Crocidura olivieri spurelli* | ([Dubey et al. 2008b](#_ENREF_18)) |
| EF524745 EF524638 | *Crocidura olivieri kivu* | ([Dubey et al. 2008b](#_ENREF_18)) |
| EF524751 | *Crocidura foetida* | ([Dubey et al. 2008b](#_ENREF_18)) |
| EF524760 EF524654 | *Crocidura olivieri cara* | ([Dubey et al. 2008b](#_ENREF_18)) |
| EF524772 EF524664 | *Crocidura cf muricauda* | ([Dubey et al. 2008b](#_ENREF_18)) |
| EF524782 EF524674 | *Crocidura roosevelti* | ([Dubey et al. 2008b](#_ENREF_18)) |
| EF524784 EF524677 | *Crocidura jouvenetae* | ([Dubey et al. 2008b](#_ENREF_18)) |
| EF524786 EF524679 | *Crocidura cf crossei* | ([Dubey et al. 2008b](#_ENREF_18)) |
| EU122213 | *Crocidura horsfieldii* | ([Meegaskumbura et al. 2007](#_ENREF_36)) |
| EU122216 | *Crocidura miya* | ([Meegaskumbura et al. 2007](#_ENREF_36)) |
| EU122223 | *Crocidura hikmiya* | ([Meegaskumbura et al. 2007](#_ENREF_36)) |
| EU742596 | *Crocidura baileyi* | ([Bannikova et al. 2009](#_ENREF_3)) |
| EU742598 | *Crocidura glassi* | ([Bannikova et al. 2009](#_ENREF_3)) |
| EU742599 | *Crocidura thalia* | ([Bannikova et al. 2009](#_ENREF_3)) |
| EU742601 | *Crocidura macmillani* | ([Bannikova et al. 2009](#_ENREF_3)) |
| EU742602 | *Crocidura parvipes* | ([Bannikova et al. 2009](#_ENREF_3)) |
| FJ378654 | *Crocidura luna* | ([Castiglia et al. 2009](#_ENREF_8)) |
| FJ813929 | *Crocidura musseri* | ([Esselstyn et al. 2009](#_ENREF_23)) |
| FJ813968 | *Crocidura batakorum* | ([Esselstyn et al. 2009](#_ENREF_23)) |
| FJ814023 | *Crocidura lepidura* | ([Esselstyn et al. 2009](#_ENREF_23)) |
| FJ814030 | *Crocidura brunnea* | ([Esselstyn et al. 2009](#_ENREF_23)) |
| FJ814054 | *Crocidura foetida* | ([Esselstyn et al. 2009](#_ENREF_23)) |
| GQ290374 | *Suncus montanus* Sri Lanka | ([Meegaskumbura et al. 2010](#_ENREF_37)) |
| GU358517 | *Crocidura wuchihensis* | ([Esselstyn and Oliveros 2010](#_ENREF_22)) |
| GU358535 | *Crocidura rapax kurodai* | ([Esselstyn and Oliveros 2010](#_ENREF_22)) |
| GU358540 | *Crocidura tanakae* | ([Esselstyn and Oliveros 2010](#_ENREF_22)) |
| HM586999 | *Crocidura sokolovi* | ([Bannikova et al. 2011](#_ENREF_4)) |
| HM587011 | *Crocidura phuquocensis* | ([Bannikova et al. 2011](#_ENREF_4)) |
| HM587021 | *Crocidura zaitsevi* | ([Bannikova et al. 2011](#_ENREF_4)) |
| HM587023 | *Crocidura indochinensis* | ([Bannikova et al. 2011](#_ENREF_4)) |
| HQ663931 | *Crocidura dsinezumi* | Unpublished |
| JF719274 | *Crocidura buettikoferi* | ([Kang et al. 2011](#_ENREF_32)) |
| JQ732752 | *Crocidura grandiceps* | ([Jacquet et al. 2012](#_ENREF_30)) |
| JX162666 | *Crocidura monticola* | ([Omar et al. 2013](#_ENREF_45)) |
| JX181939 | *Crocidura phanluongi* | ([Abramov et al. 2012](#_ENREF_1)) |
| JX181941 | *Crocidura fuliginosa* | ([Abramov et al. 2012](#_ENREF_1)) |
| KC684125 | *Crocidura obscurior* | ([Jacquet et al. 2014](#_ENREF_31)) |
| KC684156 | *Crocidura eburnea* | ([Jacquet et al. 2014](#_ENREF_31)) |
| KC684161 | *Crocidura olivieri* | ([Jacquet et al. 2014](#_ENREF_31)) |
| KC684301 | *Crocidura ichnusae* | ([Nicolas et al. 2014](#_ENREF_40)) |
| KC684929 | *Crocidura douceti* | ([Gu et al. 2013](#_ENREF_27)) |
| KF006307 | *Crocidura wimmeri* | ([Vogel et al. 2014](#_ENREF_51)) |
| KF110759 | *Crocidura stenocephala* | ([Stanley et al. 2013](#_ENREF_50)) |
| KF110760 | *Crocidura maurisca* | ([Stanley et al. 2013](#_ENREF_50)) |
| KF110761 | *Crocidura niobe* | ([Stanley et al. 2013](#_ENREF_50)) |
| KF110762 | *Crocidura dolichura* | ([Stanley et al. 2013](#_ENREF_50)) |
| KF110763 | *Crocidura silacea* | ([Stanley et al. 2013](#_ENREF_50)) |
| KF283193 | *Crocidura maxi* | ([Esselstyn et al. 2013](#_ENREF_21)) |
| KF690157 | *Crocidura goliath* | ([Jacquet et al. 2015](#_ENREF_29)) |
| KF690195 | *Crocidura viaria* | ([Jacquet et al. 2015](#_ENREF_29)) |
| KF690205 | *Crocidura fulvastra* | ([Jacquet et al. 2015](#_ENREF_29)) |
| KF801080 | *Crocidura paradoxura* | ([Demos et al. 2016b](#_ENREF_11)) |
| KF801083 | *Crocidura absconditus* | ([Demos et al. 2016b](#_ENREF_11)) |
| KM658987 | *Crocidura somalica* | ([Jacquet et al. 2015](#_ENREF_29)) |
| KP061976 | *Crocidura kivuana* | ([Stanley et al. 2015](#_ENREF_49)) |
| KP061978 | *Crocidura lanosa* | ([Stanley et al. 2015](#_ENREF_49)) |
| KP061979 | *Crocidura latona* | ([Stanley et al. 2015](#_ENREF_49)) |
| KP061982 | *Crocidura littoralis* | ([Stanley et al. 2015](#_ENREF_49)) |
| KP062017 | *Crocidura munissii* | ([Stanley et al. 2015](#_ENREF_49)) |
| KP062071 | *Crocidura tansaniana* | ([Stanley et al. 2015](#_ENREF_49)) |
| KP062149 | *Crocidura mdumai* | ([Stanley et al. 2015](#_ENREF_49)) |
| KP062151 | *Crocidura turba* | ([Stanley et al. 2015](#_ENREF_49)) |
| KP062154 | *Crocidura usambarae* | ([Stanley et al. 2015](#_ENREF_49)) |
| KP062160 | *Crocidura telfordi* | ([Stanley et al. 2015](#_ENREF_49)) |
| KP062184 | *Crocidura newmarki* | ([Stanley et al. 2015](#_ENREF_49)) |
| KP749242 | *Crocidura poensis* | ([Ceríaco et al. 2015](#_ENREF_9)) |
| KP749263 | *Crocidura fingui* | ([Ceríaco et al. 2015](#_ENREF_9)) |
| KR537875 | *Crocidura orientalis* | ([Giarla and Esselstyn 2015](#_ENREF_26)) |
| KR537877 | *Crocidura palawanensis* | ([Giarla and Esselstyn 2015](#_ENREF_26)) |
| KR537878 | *Crocidura ninoyi* | ([Giarla and Esselstyn 2015](#_ENREF_26)) |
| KR537881 | *Crocidura negrina* | ([Giarla and Esselstyn 2015](#_ENREF_26)) |
| KR537882 | *Crocidura panayensis* | ([Giarla and Esselstyn 2015](#_ENREF_26)) |
| KR537884 | *Crocidura grayi* | ([Giarla and Esselstyn 2015](#_ENREF_26)) |
| KR537888 | *Crocidura mindorus* | ([Giarla and Esselstyn 2015](#_ENREF_26)) |
| KR537891 | *Crocidura beatus* | ([Giarla and Esselstyn 2015](#_ENREF_26)) |
| KX469563 | *Crocidura beccarii* | ([Demos et al. 2016a](#_ENREF_10)) |
| KX469628 | *Crocidura neglecta* | ([Demos et al. 2016a](#_ENREF_10)) |
| KX469667 | *Crocidura vosmaeri* | ([Demos et al. 2016a](#_ENREF_10)) |
| KY595785 | *Crocidura fumosa* | ([Sabuni et al. 2018](#_ENREF_46)) |
| KY595788 | *Crocidura monax* | ([Sabuni et al. 2018](#_ENREF_46)) |
| KY595808 | *Crocidura montis* | ([Sabuni et al. 2018](#_ENREF_46)) |
| KY595830 | *Crocidura hildegardeae* | ([Sabuni et al. 2018](#_ENREF_46)) |
| KY771733 | *Crocidura elongata* | ([Eldridge et al. 2018](#_ENREF_20)) |
| LC126460 | *Suncus murinus* Japan | ([Ohdachi et al. 2016](#_ENREF_43)) |
| LC126565 | *Suncus murinus* Iran | ([Ohdachi et al. 2016](#_ENREF_43)) |
| LC126577 | *Suncus murinus* Madagascar | ([Ohdachi et al. 2016](#_ENREF_43)) |
| LC126597 | *Suncus etruscus* Iran | ([Ohdachi et al. 2016](#_ENREF_43)) |
| LR536310 | *Crocidura leucodon* Israel | This work |
| LR536314 | *Crocidura leucodon* Israel | This work |
| LR536324 | *Crocidura gueldenstaedtii* Israel | This work |
| LR536325 | *Crocidura gueldenstaedtii* Israel | This work |
| LR536329 | *Crocidura ramona* | This work |
| LR536368 | *Suncus etruscus* Israel | This work |
| LR536369 | *Suncus etruscus* Israel | This work |
| LR536373 | *Crocidura ramona* | This work |
| LR536374 | *Crocidura ramona* | This work |
| LR536500 | *Crocidura nana* | This work |
| LR536501 | *Crocidura nana* | This work |
| MF136351 | *Crocidura shantungensis* | ([Lee et al. 2018](#_ENREF_34)) |
| MF988027 | *Crocidura suaveolens* Spain | ([Biedma et al. 2017](#_ENREF_5)) |
| MG973432 | *Crocidura batesi* | ([Hutterer et al. 2018](#_ENREF_28)) |
| MH602275 | *Crocidura leucodon* Iran | ([Mahmoudi et al. 2019](#_ENREF_35)) |

**Supplementary Table S4. Accession numbers of the sequences used in Figure 3 and references.**

| **Accession** | **Taxon** | **Reference** |
| --- | --- | --- |
| AY918401 | *Crocidura leucodon* Switzerland | ([Brändli et al. 2005](#_ENREF_6)) |
| AY918402 | *Crocidura leucodon* Switzerland | ([Brändli et al. 2005](#_ENREF_6)) |
| AY918403 | *Crocidura leucodon* Switzerland | ([Brändli et al. 2005](#_ENREF_6)) |
| DQ065609 | *Crocidura leucodon* Eastern Turkey | ([Dubey et al. 2007d](#_ENREF_16)) |
| DQ994744 | *Crocidura leucodon* Switzerland | ([Dubey et al. 2007c](#_ENREF_14)) |
| DQ994745 | *Crocidura leucodon* Switzerland | ([Dubey et al. 2007c](#_ENREF_14)) |
| DQ994746 | *Crocidura leucodon* Switzerland | ([Dubey et al. 2007c](#_ENREF_14)) |
| DQ994748 | *Crocidura leucodon* Switzerland | ([Dubey et al. 2007c](#_ENREF_14)) |
| DQ994750 | *Crocidura leucodon* Switzerland | ([Dubey et al. 2007c](#_ENREF_14)) |
| DQ994751 | *Crocidura leucodon* Eastern Turkey | ([Dubey et al. 2007c](#_ENREF_14)) |
| DQ994752 | *Crocidura leucodon* Eastern Turkey | ([Dubey et al. 2007c](#_ENREF_14)) |
| DQ994756 | *Crocidura leucodon* Georgia | ([Dubey et al. 2007c](#_ENREF_14)) |
| DQ994757 | *Crocidura leucodon* Georgia | ([Dubey et al. 2007c](#_ENREF_14)) |
| DQ994758 | *Crocidura leucodon* Georgia | ([Dubey et al. 2007c](#_ENREF_14)) |
| DQ994759 | *Crocidura leucodon* Eastern Turkey | ([Dubey et al. 2007c](#_ENREF_14)) |
| DQ994761 | *Crocidura leucodon* Germany | ([Dubey et al. 2007c](#_ENREF_14)) |
| DQ994764 | *Crocidura leucodon* Germany | ([Dubey et al. 2007c](#_ENREF_14)) |
| DQ994765 | *Crocidura leucodon* Slovak Republic | ([Dubey et al. 2007c](#_ENREF_14)) |
| DQ994767 | *Crocidura leucodon* Italy | ([Dubey et al. 2007c](#_ENREF_14)) |
| DQ994769 | *Crocidura leucodon* Italy | ([Dubey et al. 2007c](#_ENREF_14)) |
| DQ994770 | *Crocidura leucodon* Italy | ([Dubey et al. 2007c](#_ENREF_14)) |
| DQ994771 | *Crocidura leucodon* Italy | ([Dubey et al. 2007c](#_ENREF_14)) |
| DQ994773 | *Crocidura leucodon* Italy | ([Dubey et al. 2007c](#_ENREF_14)) |
| DQ994774 | *Crocidura leucodon* Bulgaria | ([Dubey et al. 2007c](#_ENREF_14)) |
| DQ994776 | *Crocidura leucodon* Bulgaria | ([Dubey et al. 2007c](#_ENREF_14)) |
| DQ994777 | *Crocidura leucodon* Lesbos Greece | ([Dubey et al. 2007c](#_ENREF_14)) |
| DQ994778 | *Crocidura leucodon* Lesbos Greece | ([Dubey et al. 2007c](#_ENREF_14)) |
| DQ994779 | *Crocidura leucodon* France | ([Dubey et al. 2007c](#_ENREF_14)) |
| DQ994781 | *Crocidura leucodon* France | ([Dubey et al. 2007c](#_ENREF_14)) |
| DQ994784 | *Crocidura leucodon* France | ([Dubey et al. 2007c](#_ENREF_14)) |
| DQ994785 | *Crocidura leucodon* Switzerland | ([Dubey et al. 2007c](#_ENREF_14)) |
| DQ994786 | *Crocidura leucodon* Eastern Turkey | ([Dubey et al. 2007c](#_ENREF_14)) |
| DQ994787 | *Crocidura leucodon* Eastern Turkey | ([Dubey et al. 2007c](#_ENREF_14)) |
| DQ994788 | *Crocidura leucodon* Czech Republic | ([Dubey et al. 2007c](#_ENREF_14)) |
| DQ994790 | *Crocidura leucodon* Serbia | ([Dubey et al. 2007c](#_ENREF_14)) |
| DQ994791 | *Crocidura leucodon* Romania | ([Dubey et al. 2007c](#_ENREF_14)) |
| DQ994793 | *Crocidura leucodon* Slovenia | ([Dubey et al. 2007c](#_ENREF_14)) |
| DQ994794 | *Crocidura leucodon* Switzerland | ([Dubey et al. 2007c](#_ENREF_14)) |
| DQ994795 | *Crocidura leucodon* Germany | ([Dubey et al. 2007c](#_ENREF_14)) |
| DQ994796 | *Crocidura leucodon* Eastern Turkey | ([Dubey et al. 2007c](#_ENREF_14)) |
| EF417543 | *Crocidura leucodon* Western Turkey | ([Dubey et al. 2007c](#_ENREF_14)) |
| FJ813927 | *Crocidura musseri* | ([Esselstyn et al. 2009](#_ENREF_23)) |
| FJ813929 | *Crocidura musseri* | ([Esselstyn et al. 2009](#_ENREF_23)) |
| KC684154 | *Crocidura obscurior* | ([Jacquet et al. 2014](#_ENREF_31)) |
| KC684155 | *Crocidura obscurior* | ([Jacquet et al. 2014](#_ENREF_31)) |
| KC684158 | *Crocidura obscurior* | ([Jacquet et al. 2014](#_ENREF_31)) |
| LR536310 | *Crocidura leucodon* Israel | This work |
| LR536311 | *Crocidura leucodon* Israel | This work |
| LR536312 | *Crocidura leucodon* Israel | This work |
| LR536313 | *Crocidura leucodon* Israel | This work |
| LR536314 | *Crocidura leucodon* Israel | This work |
| LR536315 | *Crocidura leucodon* Israel | This work |
| LR536316 | *Crocidura leucodon* Israel | This work |
| LR536366 | *Crocidura leucodon* Israel | This work |
| MH602271 | *Crocidura leucodon* Northern Iran | ([Mahmoudi et al. 2019](#_ENREF_35)) |
| MH602272 | *Crocidura leucodon* Northern Iran | ([Mahmoudi et al. 2019](#_ENREF_35)) |
| MH602273 | *Crocidura leucodon* Northern Iran | ([Mahmoudi et al. 2019](#_ENREF_35)) |
| MH602274 | *Crocidura leucodon* Northern Iran | ([Mahmoudi et al. 2019](#_ENREF_35)) |
| MH602275 | *Crocidura leucodon* Northern Iran | ([Mahmoudi et al. 2019](#_ENREF_35)) |
| MH602276 | *Crocidura leucodon* Northern Iran | ([Mahmoudi et al. 2019](#_ENREF_35)) |
| MH602277 | *Crocidura leucodon* Northern Iran | ([Mahmoudi et al. 2019](#_ENREF_35)) |
| MH602278 | *Crocidura leucodon* Northern Iran | ([Mahmoudi et al. 2019](#_ENREF_35)) |
| MH602279 | *Crocidura leucodon* Northern Iran | ([Mahmoudi et al. 2019](#_ENREF_35)) |

**Supplementary Table S5. Accession numbers of the sequences used in Figure 4 and references.**

| **Accession** | **Taxon** | **Reference** |
| --- | --- | --- |
| AB077090 | *Crocidura suaveolens* Austria | ([Ohdachi et al. 2004](#_ENREF_42)) |
| AB077278 | *Crocidura shantungensis* Russia | ([Ohdachi et al. 2004](#_ENREF_42)) |
| AB077280 | *Crocidura suaveolens* Austria | ([Ohdachi et al. 2004](#_ENREF_42)) |
| AY843447 | *Crocidura shantungensis* Japan | ([Dubey et al. 2006](#_ENREF_19)) |
| AY843448 | *Crocidura suaveolens* Greece | ([Dubey et al. 2006](#_ENREF_19)) |
| AY843449 | *Crocidura suaveolens* Greece | ([Dubey et al. 2006](#_ENREF_19)) |
| AY843450 | *Crocidura suaveolens* Italy | ([Dubey et al. 2006](#_ENREF_19)) |
| AY843451 | *Crocidura suaveolens* Hungary | ([Dubey et al. 2006](#_ENREF_19)) |
| AY843452 | *Crocidura suaveolens* Switzerland | ([Dubey et al. 2006](#_ENREF_19)) |
| AY843453 | *Crocidura suaveolens* Italy | ([Dubey et al. 2006](#_ENREF_19)) |
| AY843454 | *Crocidura suaveolens* Hungary | ([Dubey et al. 2006](#_ENREF_19)) |
| AY843455 | *Crocidura suaveolens* Greece | ([Dubey et al. 2006](#_ENREF_19)) |
| AY843456 | *Crocidura suaveolens* Italy | ([Dubey et al. 2006](#_ENREF_19)) |
| AY843457 | *Crocidura suaveolens* Italy | ([Dubey et al. 2006](#_ENREF_19)) |
| AY843458 | *Crocidura suaveolens* Bulgaria | ([Dubey et al. 2006](#_ENREF_19)) |
| AY843459 | *Crocidura suaveolens* Italy | ([Dubey et al. 2006](#_ENREF_19)) |
| AY843460 | *Crocidura suaveolens* Greece | ([Dubey et al. 2006](#_ENREF_19)) |
| AY843461 | *Crocidura suaveolens* Turkey | ([Dubey et al. 2006](#_ENREF_19)) |
| AY843462 | *Crocidura sibirica* China | ([Dubey et al. 2006](#_ENREF_19)) |
| AY843463 | *Crocidura sibirica* China | ([Dubey et al. 2006](#_ENREF_19)) |
| AY843464 | *Crocidura sibirica* China | ([Dubey et al. 2006](#_ENREF_19)) |
| AY843465 | *Crocidura sibirica* China | ([Dubey et al. 2006](#_ENREF_19)) |
| AY843466 | *Crocidura suaveolens* Turkmenistan | ([Dubey et al. 2006](#_ENREF_19)) |
| AY843467 | *Crocidura suaveolens* Russia | ([Dubey et al. 2006](#_ENREF_19)) |
| AY843468 | *Crocidura sibirica* China | ([Dubey et al. 2006](#_ENREF_19)) |
| AY843469 | *Crocidura sibirica* China | ([Dubey et al. 2006](#_ENREF_19)) |
| AY843470 | *Crocidura sibirica* China | ([Dubey et al. 2006](#_ENREF_19)) |
| AY843471 | *Crocidura sibirica* China | ([Dubey et al. 2006](#_ENREF_19)) |
| AY843472 | *Crocidura sibirica* China | ([Dubey et al. 2006](#_ENREF_19)) |
| AY843473 | *Crocidura sibirica* China | ([Dubey et al. 2006](#_ENREF_19)) |
| AY843474 | *Crocidura sibirica* China | ([Dubey et al. 2006](#_ENREF_19)) |
| AY843475 | *Crocidura suaveolens* Ukraine | ([Dubey et al. 2006](#_ENREF_19)) |
| AY843476 | *Crocidura suaveolens* Russia | ([Dubey et al. 2006](#_ENREF_19)) |
| AY843477 | *Crocidura suaveolens* Russia | ([Dubey et al. 2006](#_ENREF_19)) |
| AY843478 | *Crocidura suaveolens* Tajikistan | ([Dubey et al. 2006](#_ENREF_19)) |
| AY843479 | *Crocidura suaveolens* Turkmenistan | ([Dubey et al. 2006](#_ENREF_19)) |
| AY843480 | *Crocidura suaveolens* Turkmenistan | ([Dubey et al. 2006](#_ENREF_19)) |
| AY843481 | *Crocidura suaveolens* Turkmenistan | ([Dubey et al. 2006](#_ENREF_19)) |
| AY843482 | *Crocidura suaveolens* Tajikistan | ([Dubey et al. 2006](#_ENREF_19)) |
| AY843483 | *Crocidura suaveolens* Russia | ([Dubey et al. 2006](#_ENREF_19)) |
| AY843484 | *Crocidura sibirica* Russia | ([Dubey et al. 2006](#_ENREF_19)) |
| AY843485 | *Crocidura sibirica* Russia | ([Dubey et al. 2006](#_ENREF_19)) |
| AY843486 | *Crocidura sibirica* Russia | ([Dubey et al. 2006](#_ENREF_19)) |
| AY843487 | *Crocidura caspica* Azerbaijan | ([Dubey et al. 2006](#_ENREF_19)) |
| AY843488 | *Crocidura gueldenstaedtii* Georgia | ([Dubey et al. 2006](#_ENREF_19)) |
| AY843489 | *Crocidura suaveolens* United Kingdom | ([Dubey et al. 2006](#_ENREF_19)) |
| AY843490 | *Crocidura suaveolens* France | ([Dubey et al. 2006](#_ENREF_19)) |
| AY843491 | *Crocidura suaveolens* Spain | ([Dubey et al. 2006](#_ENREF_19)) |
| AY843492 | *Crocidura suaveolens* Spain | ([Dubey et al. 2006](#_ENREF_19)) |
| AY843493 | *Crocidura suaveolens* Italy | ([Dubey et al. 2006](#_ENREF_19)) |
| AY843494 | *Crocidura suaveolens* Italy | ([Dubey et al. 2006](#_ENREF_19)) |
| AY843495 | *Crocidura suaveolens* Italy | ([Dubey et al. 2006](#_ENREF_19)) |
| AY843496 | *Crocidura gueldenstaedtii* Georgia | ([Dubey et al. 2006](#_ENREF_19)) |
| AY843497 | *Crocidura gueldenstaedtii* Georgia | ([Dubey et al. 2006](#_ENREF_19)) |
| AY843498 | *Crocidura monacha* Turkey | ([Dubey et al. 2006](#_ENREF_19)) |
| AY843499 | *Crocidura monacha* Turkey | ([Dubey et al. 2006](#_ENREF_19)) |
| AY843500 | *Crocidura gueldenstaedtii* Georgia | ([Dubey et al. 2006](#_ENREF_19)) |
| AY843501 | *Crocidura suaveolens* France | ([Dubey et al. 2006](#_ENREF_19)) |
| AY843502 | *Crocidura monacha* Turkey | ([Dubey et al. 2006](#_ENREF_19)) |
| AY843503 | Crocidura lasiura Russia | ([Dubey et al. 2006](#_ENREF_19)) |
| AY850035 | *Crocidura suaveolens* France | ([Dubey et al. 2006](#_ENREF_19)) |
| AY925211 | *Crocidura zarudnyi* Iran | ([Dubey et al. 2007d](#_ENREF_16)) |
| AY994368 | *Crocidura caspica* Azerbaijan | ([Bannikova et al. 2006](#_ENREF_2)) |
| AY994369 | *Crocidura caspica* Azerbaijan | ([Bannikova et al. 2006](#_ENREF_2)) |
| AY994370 | *Crocidura caspica* Azerbaijan | ([Bannikova et al. 2006](#_ENREF_2)) |
| AY994373 | *Crocidura gueldenstaedtii* Russia | ([Bannikova et al. 2006](#_ENREF_2)) |
| AY994375 | *Crocidura gueldenstaedtii* Georgia | ([Bannikova et al. 2006](#_ENREF_2)) |
| AY994376 | *Crocidura gueldenstaedtii* Georgia | ([Bannikova et al. 2006](#_ENREF_2)) |
| AY994377 | *Crocidura suaveolens* Ukraine | ([Bannikova et al. 2006](#_ENREF_2)) |
| AY994386 | *Crocidura suaveolens* Russia | ([Bannikova et al. 2006](#_ENREF_2)) |
| AY994387 | *Crocidura suaveolens* Mongolia | ([Bannikova et al. 2006](#_ENREF_2)) |
| AY994388 | *Crocidura suaveolens* Italy | ([Bannikova et al. 2006](#_ENREF_2)) |
| AY994389 | *Crocidura sibirica* Russia | ([Bannikova et al. 2006](#_ENREF_2)) |
| DQ059023 | *Crocidura caspica* | ([Dubey et al. 2006](#_ENREF_19)) |
| DQ059024 | *Crocidura nigripes* | ([Dubey et al. 2006](#_ENREF_19)) |
| DQ059025 | *Crocidura brunnea* | ([Dubey et al. 2006](#_ENREF_19)) |
| DQ242541 | *Crocidura suaveolens* Hungary | ([Dubey et al. 2007e](#_ENREF_17)) |
| DQ630050 | *Crocidura suaveolens* | ([Dubey et al. 2007b](#_ENREF_13)) |
| DQ630051 | *Crocidura suaveolens* | ([Dubey et al. 2007b](#_ENREF_13)) |
| DQ630052 | *Crocidura suaveolens* | ([Dubey et al. 2007b](#_ENREF_13)) |
| DQ630053 | *Crocidura suaveolens* | ([Dubey et al. 2007b](#_ENREF_13)) |
| DQ630054 | *Crocidura suaveolens* | ([Dubey et al. 2007b](#_ENREF_13)) |
| DQ630055 | *Crocidura caspica* | ([Dubey et al. 2007b](#_ENREF_13)) |
| DQ630056 | *Crocidura caspica* | ([Dubey et al. 2007b](#_ENREF_13)) |
| DQ630057 | *Crocidura caspica* | ([Dubey et al. 2007b](#_ENREF_13)) |
| DQ630058 | *Crocidura* sp | ([Dubey et al. 2007b](#_ENREF_13)) |
| DQ630059 | *Crocidura* sp | ([Dubey et al. 2007b](#_ENREF_13)) |
| DQ630060 | *Crocidura aleksandrisi* | ([Dubey et al. 2007b](#_ENREF_13)) |
| DQ630061 | *Crocidura aleksandrisi* | ([Dubey et al. 2007b](#_ENREF_13)) |
| DQ630062 | *Crocidura suaveolens* | ([Dubey et al. 2007b](#_ENREF_13)) |
| DQ630063 | *Crocidura suaveolens* | ([Dubey et al. 2007b](#_ENREF_13)) |
| DQ630064 | *Crocidura suaveolens* | ([Dubey et al. 2007b](#_ENREF_13)) |
| DQ630065 | *Crocidura suaveolens* | ([Dubey et al. 2007b](#_ENREF_13)) |
| DQ630066 | *Crocidura suaveolens* | ([Dubey et al. 2007b](#_ENREF_13)) |
| DQ630067 | *Crocidura suaveolens* | ([Dubey et al. 2007b](#_ENREF_13)) |
| DQ630068 | *Crocidura suaveolens* | ([Dubey et al. 2007b](#_ENREF_13)) |
| DQ630069 | *Crocidura gueldenstaedtii* | ([Dubey et al. 2007b](#_ENREF_13)) |
| DQ630070 | *Crocidura gueldenstaedtii* | ([Dubey et al. 2007b](#_ENREF_13)) |
| DQ630071 | *Crocidura gueldenstaedtii* | ([Dubey et al. 2007b](#_ENREF_13)) |
| DQ630072 | *Crocidura gueldenstaedtii* | ([Dubey et al. 2007b](#_ENREF_13)) |
| DQ630073 | *Crocidura gueldenstaedtii* | ([Dubey et al. 2007b](#_ENREF_13)) |
| DQ630074 | *Crocidura gueldenstaedtii* | ([Dubey et al. 2007b](#_ENREF_13)) |
| DQ630075 | *Crocidura gueldenstaedtii* | ([Dubey et al. 2007b](#_ENREF_13)) |
| DQ630076 | *Crocidura gueldenstaedtii* | ([Dubey et al. 2007b](#_ENREF_13)) |
| DQ630077 | *Crocidura gueldenstaedtii* | ([Dubey et al. 2007b](#_ENREF_13)) |
| DQ630078 | *Crocidura gueldenstaedtii* | ([Dubey et al. 2007b](#_ENREF_13)) |
| DQ630079 | *Crocidura gueldenstaedtii* | ([Dubey et al. 2007b](#_ENREF_13)) |
| DQ630080 | *Crocidura gueldenstaedtii* | ([Dubey et al. 2007b](#_ENREF_13)) |
| DQ630081 | *Crocidura gueldenstaedtii* | ([Dubey et al. 2007b](#_ENREF_13)) |
| DQ630082 | *Crocidura gueldenstaedtii* | ([Dubey et al. 2007b](#_ENREF_13)) |
| DQ630083 | *Crocidura gueldenstaedtii* | ([Dubey et al. 2007b](#_ENREF_13)) |
| DQ630084 | *Crocidura gueldenstaedtii* | ([Dubey et al. 2007b](#_ENREF_13)) |
| DQ630085 | *Crocidura gueldenstaedtii* | ([Dubey et al. 2007b](#_ENREF_13)) |
| DQ630086 | *Crocidura gueldenstaedtii* | ([Dubey et al. 2007b](#_ENREF_13)) |
| DQ630087 | *Crocidura gueldenstaedtii* | ([Dubey et al. 2007b](#_ENREF_13)) |
| DQ630088 | *Crocidura gueldenstaedtii* | ([Dubey et al. 2007b](#_ENREF_13)) |
| DQ630089 | *Crocidura gueldenstaedtii* | ([Dubey et al. 2007b](#_ENREF_13)) |
| DQ630090 | *Crocidura gueldenstaedtii* | ([Dubey et al. 2007b](#_ENREF_13)) |
| DQ630091 | *Crocidura gueldenstaedtii* | ([Dubey et al. 2007b](#_ENREF_13)) |
| DQ630092 | *Crocidura gueldenstaedtii* | ([Dubey et al. 2007b](#_ENREF_13)) |
| DQ630093 | *Crocidura gueldenstaedtii* | ([Dubey et al. 2007b](#_ENREF_13)) |
| DQ630094 | *Crocidura gueldenstaedtii* | ([Dubey et al. 2007b](#_ENREF_13)) |
| DQ630095 | *Crocidura suaveolens* | ([Dubey et al. 2007b](#_ENREF_13)) |
| DQ630096 | *Crocidura suaveolens* | ([Dubey et al. 2007b](#_ENREF_13)) |
| DQ630097 | *Crocidura suaveolens* | ([Dubey et al. 2007b](#_ENREF_13)) |
| DQ630098 | *Crocidura suaveolens* | ([Dubey et al. 2007b](#_ENREF_13)) |
| DQ630099 | *Crocidura gueldenstaedtii* | ([Dubey et al. 2007b](#_ENREF_13)) |
| DQ630100 | *Crocidura gueldenstaedtii* | ([Dubey et al. 2007b](#_ENREF_13)) |
| DQ630101 | *Crocidura gueldenstaedtii* | ([Dubey et al. 2007b](#_ENREF_13)) |
| DQ630102 | *Crocidura gueldenstaedtii* | ([Dubey et al. 2007b](#_ENREF_13)) |
| DQ630103 | *Crocidura gueldenstaedtii* | ([Dubey et al. 2007b](#_ENREF_13)) |
| DQ630104 | *Crocidura gueldenstaedtii* | ([Dubey et al. 2007b](#_ENREF_13)) |
| DQ630105 | *Crocidura gueldenstaedtii* | ([Dubey et al. 2007b](#_ENREF_13)) |
| DQ630106 | *Crocidura gueldenstaedtii* | ([Dubey et al. 2007b](#_ENREF_13)) |
| DQ630107 | *Crocidura gueldenstaedtii* | ([Dubey et al. 2007b](#_ENREF_13)) |
| DQ630108 | *Crocidura gueldenstaedtii* | ([Dubey et al. 2007b](#_ENREF_13)) |
| DQ630109 | *Crocidura gueldenstaedtii* | ([Dubey et al. 2007b](#_ENREF_13)) |
| DQ630110 | *Crocidura suaveolens* | ([Dubey et al. 2007b](#_ENREF_13)) |
| DQ630111 | *Crocidura suaveolens* | ([Dubey et al. 2007b](#_ENREF_13)) |
| DQ630112 | *Crocidura suaveolens* | ([Dubey et al. 2007b](#_ENREF_13)) |
| DQ630114 | *Crocidura suaveolens* | ([Dubey et al. 2007b](#_ENREF_13)) |
| DQ630115 | *Crocidura suaveolens* | ([Dubey et al. 2007b](#_ENREF_13)) |
| DQ630116 | *Crocidura suaveolens* | ([Dubey et al. 2007b](#_ENREF_13)) |
| DQ630117 | *Crocidura suaveolens* | ([Dubey et al. 2007b](#_ENREF_13)) |
| DQ630118 | *Crocidura suaveolens* | ([Dubey et al. 2007b](#_ENREF_13)) |
| DQ630119 | *Crocidura suaveolens* | ([Dubey et al. 2007b](#_ENREF_13)) |
| DQ630120 | *Crocidura suaveolens* | ([Dubey et al. 2007b](#_ENREF_13)) |
| DQ630121 | *Crocidura suaveolens* | ([Dubey et al. 2007b](#_ENREF_13)) |
| DQ641270 | *Crocidura gueldenstaedtii* | ([Dubey et al. 2007b](#_ENREF_13)) |
| EU742605 | *Crocidura suaveolens mimula* Germany | ([Bannikova et al. 2009](#_ENREF_3)) |
| EU742606 | *Crocidura suaveolens mimula* Ukraine | ([Bannikova et al. 2009](#_ENREF_3)) |
| EU742607 | *Crocidura suaveolens mimula* Ukraine | ([Bannikova et al. 2009](#_ENREF_3)) |
| EU742608 | *Crocidura gueldenstaedtii* Azerbaijan | ([Bannikova et al. 2009](#_ENREF_3)) |
| EU742609 | *Crocidura suaveolens* Russia | ([Bannikova et al. 2009](#_ENREF_3)) |
| EU742610 | *Crocidura suaveolens* Russia | ([Bannikova et al. 2009](#_ENREF_3)) |
| EU742611 | *Crocidura suaveolens* Uzbekistan | ([Bannikova et al. 2009](#_ENREF_3)) |
| EU742612 | *Crocidura suaveolens* Uzbekistan | ([Bannikova et al. 2009](#_ENREF_3)) |
| EU742613 | *Crocidura suaveolens* Russia | ([Bannikova et al. 2009](#_ENREF_3)) |
| EU742614 | *Crocidura suaveolens* Russia | ([Bannikova et al. 2009](#_ENREF_3)) |
| HM586991 | *Crocidura suaveolens* Ukraine | ([Bannikova et al. 2011](#_ENREF_4)) |
| HM586992 | *Crocidura suaveolens* Ukraine | ([Bannikova et al. 2011](#_ENREF_4)) |
| JF318997 | *Crocidura suaveolens* Germany | ([Schlegel et al. 2012](#_ENREF_47)) |
| KF144159 | *Crocidura shantungensis* South Korea | ([Koh et al. 2013](#_ENREF_33)) |
| KF144163 | *Crocidura shantungensis* Russia | ([Koh et al. 2013](#_ENREF_33)) |
| KP343785 | *Crocidura suaveolens* Afghanistan | ([Gertler et al. 2017](#_ENREF_25)) |
| KP343786 | *Crocidura suaveolens* Afghanistan | ([Gertler et al. 2017](#_ENREF_25)) |
| KP343787 | *Crocidura suaveolens* Afghanistan | ([Gertler et al. 2017](#_ENREF_25)) |
| KP343788 | *Crocidura suaveolens* Afghanistan | ([Gertler et al. 2017](#_ENREF_25)) |
| KP343789 | *Crocidura suaveolens* Afghanistan | ([Gertler et al. 2017](#_ENREF_25)) |
| KP343790 | *Crocidura suaveolens* Afghanistan | ([Gertler et al. 2017](#_ENREF_25)) |
| KP343791 | *Crocidura suaveolens* Afghanistan | ([Gertler et al. 2017](#_ENREF_25)) |
| KP343792 | *Crocidura suaveolens* Afghanistan | ([Gertler et al. 2017](#_ENREF_25)) |
| KX354181 | *Crocidura suaveolens* China | ([Sheftel et al. 2018](#_ENREF_48)) |
| KY677734 | *Crocidura suaveolens* | ([Castiglia et al. 2017](#_ENREF_7)) |
| KY677736 | *Crocidura suaveolens* | ([Castiglia et al. 2017](#_ENREF_7)) |
| KY677737 | *Crocidura suaveolens* | ([Castiglia et al. 2017](#_ENREF_7)) |
| KY677738 | *Crocidura suaveolens* | ([Castiglia et al. 2017](#_ENREF_7)) |
| LR536317 | *Crocidura gueldenstaedtii* Israel | This work |
| LR536318 | *Crocidura gueldenstaedtii* Israel | This work |
| LR536319 | *Crocidura gueldenstaedtii* Israel | This work |
| LR536320 | *Crocidura gueldenstaedtii* Israel | This work |
| LR536321 | *Crocidura gueldenstaedtii* Israel | This work |
| LR536322 | *Crocidura gueldenstaedtii* Israel | This work |
| LR536323 | *Crocidura gueldenstaedtii* Israel | This work |
| LR536324 | *Crocidura gueldenstaedtii* Israel | This work |
| LR536325 | *Crocidura gueldenstaedtii* Israel | This work |
| LR536326 | *Crocidura gueldenstaedtii* Israel | This work |
| LR536367 | *Crocidura gueldenstaedtii* Israel | This work |
| LR536372 | *Crocidura gueldenstaedtii* Israel | This work |
| MF988005 | *Crocidura suaveolens* Spain | ([Biedma et al. 2017](#_ENREF_5)) |
| MF988006 | *Crocidura suaveolens* Spain | ([Biedma et al. 2017](#_ENREF_5)) |
| MF988007 | *Crocidura suaveolens* Spain | ([Biedma et al. 2017](#_ENREF_5)) |
| MF988008 | *Crocidura suaveolens* Spain | ([Biedma et al. 2017](#_ENREF_5)) |
| MF988009 | *Crocidura suaveolens* Spain | ([Biedma et al. 2017](#_ENREF_5)) |
| MF988010 | *Crocidura suaveolens* Spain | ([Biedma et al. 2017](#_ENREF_5)) |
| MF988011 | *Crocidura suaveolens* Spain | ([Biedma et al. 2017](#_ENREF_5)) |
| MF988012 | *Crocidura suaveolens* Spain | ([Biedma et al. 2017](#_ENREF_5)) |
| MF988022 | *Crocidura suaveolens* Spain | ([Biedma et al. 2017](#_ENREF_5)) |
| MF988023 | *Crocidura suaveolens* Spain | ([Biedma et al. 2017](#_ENREF_5)) |
| MF988024 | *Crocidura suaveolens* Spain | ([Biedma et al. 2017](#_ENREF_5)) |
| MF988025 | *Crocidura suaveolens* Spain | ([Biedma et al. 2017](#_ENREF_5)) |
| MF988026 | *Crocidura suaveolens* Spain | ([Biedma et al. 2017](#_ENREF_5)) |
| MF988027 | *Crocidura suaveolens* Spain | ([Biedma et al. 2017](#_ENREF_5)) |
| MF988028 | *Crocidura suaveolens* Spain | ([Biedma et al. 2017](#_ENREF_5)) |
| MF988029 | *Crocidura suaveolens* Spain | ([Biedma et al. 2017](#_ENREF_5)) |
| MF988030 | *Crocidura suaveolens* Spain | ([Biedma et al. 2017](#_ENREF_5)) |
| MF988031 | *Crocidura suaveolens* Spain | ([Biedma et al. 2017](#_ENREF_5)) |
| MF988032 | *Crocidura suaveolens* Spain | ([Biedma et al. 2017](#_ENREF_5)) |
| MF988033 | *Crocidura suaveolens* Spain | ([Biedma et al. 2017](#_ENREF_5)) |
| MF988034 | *Crocidura suaveolens* Spain | ([Biedma et al. 2017](#_ENREF_5)) |
| MF988035 | *Crocidura suaveolens* Spain | ([Biedma et al. 2017](#_ENREF_5)) |
| MF988036 | *Crocidura suaveolens* Spain | ([Biedma et al. 2017](#_ENREF_5)) |
| MF988037 | *Crocidura suaveolens* Spain | ([Biedma et al. 2017](#_ENREF_5)) |
| MF988046 | *Crocidura suaveolens* Spain | ([Biedma et al. 2017](#_ENREF_5)) |
| MF988047 | *Crocidura suaveolens* Spain | ([Biedma et al. 2017](#_ENREF_5)) |

**Supplementary Table S6. Accession numbers of the sequences used in Figure 5 and references.**

| **Accession** | **Taxon** | **Reference** |
| --- | --- | --- |
| AB175076 | *Suncus stoliczkanus* Nepal | ([Ohdachi et al. 2006](#_ENREF_41)) |
| AB175077 | *Suncus stoliczkanus* Nepal | ([Ohdachi et al. 2006](#_ENREF_41)) |
| DQ630388 | *Suncus montanus* India | ([Dubey et al. 2007e](#_ENREF_17)) |
| DQ630389 | *Suncus dayi* | ([Dubey et al. 2007e](#_ENREF_17)) |
| DQ630396 | *Suncus etruscus* France | ([Dubey et al. 2007e](#_ENREF_17)) |
| DQ630397 | *Suncus etruscus* Italy | ([Dubey et al. 2007e](#_ENREF_17)) |
| DQ630432 | *Suncus dayi* | ([Dubey et al. 2007e](#_ENREF_17)) |
| EU426973 | *Suncus madagascariensis* | ([Willows-Munro and Matthee 2011](#_ENREF_53)) |
| FJ716836 | *Suncus etruscus* Sri Lanka | ([Meegaskumbura and Schneider 2008](#_ENREF_39)) |
| GQ290374 | *Suncus montanus* Sri Lanka | ([Meegaskumbura et al. 2010](#_ENREF_37)) |
| GQ290375 | *Suncus montanus* Sri Lanka | ([Meegaskumbura et al. 2010](#_ENREF_37)) |
| JF817391 | *Suncus malayanus* | ([Omar et al. 2011](#_ENREF_44)) |
| JF817392 | *Suncus malayanus* | ([Omar et al. 2011](#_ENREF_44)) |
| JF817393 | *Suncus malayanus* | ([Omar et al. 2011](#_ENREF_44)) |
| JF817394 | *Suncus madagascariensis* | ([Omar et al. 2011](#_ENREF_44)) |
| JF817395 | *Suncus madagascariensis* | ([Omar et al. 2011](#_ENREF_44)) |
| JF817396 | *Suncus etruscus* France | ([Omar et al. 2011](#_ENREF_44)) |
| JF914980 | *Suncus fellowesgordoni* Sri Lanka | ([Meegaskumbura et al. 2012](#_ENREF_38)) |
| JF914981 | *Suncus fellowesgordoni* | ([Meegaskumbura et al. 2012](#_ENREF_38)) |
| JF914982 | *Suncus fellowesgordoni* | ([Meegaskumbura et al. 2012](#_ENREF_38)) |
| JF914983 | *Suncus fellowesgordoni* | ([Meegaskumbura et al. 2012](#_ENREF_38)) |
| JN556043 | *Suncus etruscus* India | ([Meegaskumbura et al. 2012](#_ENREF_38)) |
| KF110756 | *Suncus etruscus* Vietnam | ([Stanley et al. 2013](#_ENREF_50)) |
| KF294418 | *Suncus murinus* China | ([Wang et al. 2015](#_ENREF_52)) |
| KP343796 | *Suncus etruscus* Afghanistan | ([Gertler et al. 2017](#_ENREF_25)) |
| LC126460 | *Suncus murinus* Okinawa | ([Ohdachi et al. 2016](#_ENREF_43)) |
| LC126565 | *Suncus murinus* Iran | ([Ohdachi et al. 2016](#_ENREF_43)) |
| LC126566 | *Suncus murinus* Iran | ([Ohdachi et al. 2016](#_ENREF_43)) |
| LC126577 | *Suncus murinus* Madagascar | ([Ohdachi et al. 2016](#_ENREF_43)) |
| LC126597 | *Suncus etruscus* Iran | ([Ohdachi et al. 2016](#_ENREF_43)) |
| LR536327 | *Suncus etruscus* Israel | This work |
| LR536328 | *Suncus etruscus* Israel | This work |
| LR536368 | *Suncus etruscus* Israel | This work |
| LR536369 | *Suncus etruscus* Israel | This work |
| LR536370 | *Suncus etruscus* Israel | This work |
| LR536371 | *Suncus etruscus* Israel | This work |

**References**

Abramov, A. V., Bannikova, A. A. & Rozhnov, V. V. 2012. White-toothed shrews (Mammalia, Soricomorpha, *Crocidura*) of coastal islands of Vietnam. *Zookeys* 207: 37-47.

Bannikova, A. A., Lebedev, V. S., Kramerov, D. A. & Zaitsev, M. V. 2006. Phylogeny and systematics of the *Crocidura suaveolens* species group: corroboration and controversy between nuclear and mitochondrial DNA markers. *Mammalia* 70(1-2): 106-119.

Bannikova, A. A., Sheftel, B. I., Lebedev, V. S., Aleksandrov, D. Y. & Muehlenberg, M. 2009. *Crocidura shantungensis*, a new species for Mongolia and Buryatia. *Dokl. Biol. Sci.* 424(1): 68-71.

Bannikova, А. А., Abramov, A., Borisenko, А. V., Lebedev, V. & Rozhnov, V. 2011. Mitochondrial diversity of the white-toothed shrews (Mammalia, Eulipotyphla, *Crocidura*) in Vietnam. *Zootaxa* 2812(1): 1-20.

Biedma, L., Román, J., Calzada, J., Friis, G. & Godoy, J. A. 2017. Phylogeography of *Crocidura suaveolens* (Mammalia: Soricidae) in Iberia has been shaped by competitive exclusion by *C. russula*. *Biol. J. Linn. Soc.* 123(1): 81-95.

Brändli, L., Handley, L. J., Vogel, P. & Perrin, N. 2005. Evolutionary history of the greater white-toothed shrew (*Crocidura russula*) inferred from analysis of mtDNA, Y, and X chromosome markers. *Mol. Phylogenet. Evol.* 37(3): 832-844.

Castiglia, R., Annesi, F., Amori, G., Solano, E. & Aloise, G. 2017. The phylogeography of *Crocidura suaveolens* from southern Italy reveals the absence of an endemic lineage and supports a Trans-Adriatic connection with the Balkanic refugium. [journal article]. *Hystrix* 28(1): 104-106.

Castiglia, R., Annesi, F., Sichilima, A. M. & Hutterer, R. 2009. A molecular and chromosomal study of the moonshine shrew, *Crocidura luna* Dollman, 1910 from Zambia with a description of a new remarkable karyotype. *Mammalia* 73: 56-59.

Ceríaco, L. M. P., Marques, M. P., Jacquet, F., Nicolas, V., Colyn, M., Denys, C., Sardinha, P. & Bastos-Silveira, C. 2015. Description of a new endemic species of shrew (Mammalia, Soricomorpha) from PrÍncipe Island (Gulf of Guinea). *Mammalia* 79(3): 325–341.

Demos, T. C., Achmadi, A. S., Giarla, T. C., Handika, H., Maharadatunkamsi, Rowe, K. C. & Esselstyn, J. A. 2016a. Local endemism and within-island diversification of shrews illustrate the importance of speciation in building Sundaland mammal diversity. *Mol. Ecol.* 25(20): 5158-5173.

Demos, T. C., Achmadi, A. S., Handika, H., Maharadatunkamsi, Rowe, K. C. & Esselstyn, J. A. 2016b. A new species of shrew (Soricomorpha: *Crocidura*) from Java, Indonesia: possible character displacement despite interspecific gene flow. *J. Mamm.* 98(1): 183-193.

Dubey, S., Antonin, M., Denys, C. & Vogel, P. 2007a. Use of phylogeny to resolve the taxonomy of the widespread and highly polymorphic African giant shrews (*Crocidura olivieri* group, Crocidurinae, Mammalia). *Zoology (Jena)* 110(1): 48-57.

Dubey, S., Cosson, J. F., Magnanou, E., Vohralík, V., Benda, P., Frynta, D., Hutterer, R., Vogel, V. & Vogel, P. 2007b. Mediterranean populations of the lesser white-toothed shrew (*Crocidura suaveolens* group): an unexpected puzzle of Pleistocene survivors and prehistoric introductions. *Mol. Ecol.* 16(16): 3438-3452.

Dubey, S., Cosson, J. F., Vohralík, V., Kryštufek, B., Diker, E. & Vogel, P. 2007c. Molecular evidence of Pleistocene bidirectional faunal exchange between Europe and the Near East: the case of the bicoloured shrew (*Crocidura leucodon*, Soricidae). *J. Evol. Biol.* 20(5): 1799-1808.

Dubey, S., Koyasu, K., Parapanov, R., Ribi, M., Hutterer, R. & Vogel, P. 2008a. Molecular phylogenetics reveals Messinian, Pliocene, and Pleistocene colonizations of islands by North African shrews. *Mol. Phylogenet. Evol.* 47(2): 877-882.

Dubey, S., Nová, P., Vogel, P. & Vohralík, V. 2007d. Cytogenetic and molecular relationships between Zarudny's rock shrew (*Crocidura zarudnyi*; Mammalia: Soricomorpha) and Eurasian taxa. *J. Mammal.* 88(3): 706-711.

Dubey, S., Salamin, N., Ohdachi, S. D., Barrie`re, P. & Vogel, P. 2007e. Molecular phylogenetics of shrews (Mammalia : Soricidae) reveal timing of transcontinental colonizations. *Mol. Phylogenet. Evol.* 44(1): 126-137.

Dubey, S., Salamin, N., Ruedi, M., Barriere, P., Colyn, M. & Vogel, P. 2008b. Biogeographic origin and radiation of the Old World crocidurine shrews (Mammalia: Soricidae) inferred from mitochondrial and nuclear genes. *Mol. Phylogenet. Evol.* 48(3): 953-963.

Dubey, S., Zaitsev, M., Cosson, J. F., Abdukadier, A. & Vogel, P. 2006. Pliocene and Pleistocene diversification and multiple refugia in a Eurasian shrew (*Crocidura suaveolens* group). *Mol. Phylogenet. Evol.* 38(3): 635-647.

Eldridge, R. A., Achmadi, A. S., Giarla, T. C., Rowe, K. C. & Esselstyn, J. A. 2018. Geographic isolation and elevational gradients promote diversification in an endemic shrew on Sulawesi. *Mol. Phylogenet. Evol.* 118: 306-317.

Esselstyn, J. A., Maharadatunkamsi, Achmadi, A. S., Siler, C. D. & Evans, B. J. 2013. Carving out turf in a biodiversity hotspot: multiple, previously unrecognized shrew species co-occur on Java Island, Indonesia. *Mol Ecol* 22(19): 4972-4987.

Esselstyn, J. A. & Oliveros, C. H. 2010. Colonization of the Philippines from Taiwan: a multi-locus test of the biogeographic and phylogenetic relationships of isolated populations of shrews. *J. Biogeogr.* 37(8): 1504-1514.

Esselstyn, J. A., Timm, R. M. & Brown, R. M. 2009. Do geological or climatic processes drive speciation in dynamic archipelagos? The tempo and mode of diversification in Southeast Asian shrews. *Evolution* 63(10): 2595-2610.

Fontanillas, P., Depraz, A., Giorgi, M. S. & Perrin, N. 2005. Nonshivering thermogenesis capacity associated to mitochondrial DNA haplotypes and gender in the greater white-toothed shrew, *Crocidura russula*. *Mol. Ecol.* 14(2): 661-670.

Gertler, C., Schlegel, M., Linnenbrink, M., Hutterer, R., König, P., Ehlers, B., Fischer, K., Ryll, R., Lewitzki, J., Sauer, S., Baumann, K., Breithaupt, A., Faulde, M., Teifke, J. P., Tautz, D. & Ulrich, R. G. 2017. Indigenous house mice dominate small mammal communities in northern Afghan military bases. *BMC Zool.* 2: 15.

Giarla, T. C. & Esselstyn, J. A. 2015. The challenges of resolving a rapid, recent radiation: empirical and simulated phylogenomics of Philippine shrews. *Syst. Biol.* 64(5): 727-740.

Gu, S. H., Nicolas, V., Lalis, A., Sathirapongsasuti, N. & Yanagihara, R. 2013. Complete genome sequence and molecular phylogeny of a newfound hantavirus harbored by the Doucet's musk shrew (*Crocidura douceti*) in Guinea. *Infect. Genet. Evol.* 20: 118-123.

Hutterer, R., Balete, D. S., Giarla, T. C., Heaney, L. R. & Esselstyn, J. A. 2018. A new genus and species of shrew (Mammalia: Soricidae) from Palawan Island, Philippines. *J. Mammal.* 99(3): 518-536.

Jacquet, F., Denys, C., Verheyen, E., Bryja, J., Hutterer, R., Kerbis Peterhans, J. C., Stanley, W. T., Goodman, S. M., Couloux, A., Colyn, M. & Nicolas, V. 2015. Phylogeography and evolutionary history of the *Crocidura olivieri* complex (Mammalia, Soricomorpha): from a forest origin to broad ecological expansion across Africa. *BMC Evol. Biol.* 15: 71.

Jacquet, F., Nicolas, V., Bonillo, C., Cruaud, C. & Denys, C. 2012. Barcoding, molecular taxonomy and exploration of the diversity of shrews (Soricomorpha: Soricidae) on Mount NIimba (Guinea). *Zool. J. Linnean Soc.* 166: 672-687.

Jacquet, F., Nicolas, V., Colyn, M., Kadjo, B., Hutterer, R., Decher, J., Akpatou, B., Cruaud, C. & Denys, C. 2014. Forest refugia and riverine barriers promote diversification in the West African pygmy shrew (*Crocidura obscurior* complex, Soricomorpha). *Zool. Scr.* 43(2): 131-148.

Kang, H. J., Kadjo, B., Dubey, S., Jacquet, F. & Yanagihara, R. 2011. Molecular evolution of Azagny virus, a newfound Hantavirus harbored by the West African pygmy shrew (*Crocidura obscurior*) in Cote d’Ivoire. *Virol. J.* 8: 373.

Koh, H. S., Kartavtseva, I., Lee, B. K., Kweon, G. H., Yang, B. G., Heo, S. W. & In, S. 2013. A preliminary study on genetic divergence of the Asian lesser white-toothed shrew *Crocidura shantungensis* (Mammalia: Soricomorpha) in mainland Korea, adjacent islands and continental East Asia: cytochrome *b* sequence analysis. *Russ. J. Theriol.* 12: 71-78.

Lee, S. J., Lee, M. Y., Lin, L. K., Lin, Y. K., Li, Y., Shin, E. H., Han, S. H., Min, M. S., Lee, H. & Kim, K. S. 2018. Phylogeography of the Asian lesser white-toothed shrew, *Crocidura shantungensis*, in East Asia: role of the Korean Peninsula as refugium for small mammals. *Genetica* 146(2): 211-226.

Mahmoudi, A., Darvish, J., Siahsarvie, R., Dubey, S. & Kryštufek, B. 2019. Mitochondrial sequences retrieve an ancient lineage of bicolored shrew in the Hyrcanian refugium. *Mamm. Biol.* 95: 160-163.

Meegaskumbura, S., Meegaskumbura, M., Pethiyagoda, R., Manamendra-Arachchi, K. & Schneider, C. J. 2007. *Crocidura hikmiya*, a new shrew (Mammalia: Soricomorpha: Soricidae) from Sri Lanka. *Zootaxa* 1665(1): 19-30.

Meegaskumbura, S., Meegaskumbura, M. & Schneider, C. J. 2010. Systematic relationships and taxonomy of *Suncus montanus* and *S. murinus* from Sri Lanka. *Mol. Phylogenet. Evol.* 55(2): 473-487.

Meegaskumbura, S., Meegaskumbura, M. & Schneider, C. J. 2012. Re-evaluation of the taxonomy of the Sri Lankan pigmy shrew *Suncus fellowesgordoni* (Soricidae: Crocidurinae) and its phylogenetic relationship with *S. etruscus*. *Zootaxa* (3187): 57-68.

Meegaskumbura, S. & Schneider, C. J. 2008. A taxonomic evaluation of the shrew *Suncus montanus* (Soricidae: Crocidurinae) of Sri Lanka and India. *Cey. J. Sci.* 37(2): 129-136.

Nicolas, V., Hamani, A., Amrouche, L., Bensidhoum, M., Boukhemza, M., Doumandji, S. & Denys, C. 2014. First molecular evidence for the presence of *Crocidura pachyura* (Mammalia, Soricidae) in Kabylie (Algeria). *Mammalia* 78(2): 245-249.

Ohdachi, S. D., Hasegawa, M., Iwasa, M. A., Vogel, P., Oshida, T., Lin, L.-K. & Abe, H. 2006. Molecular phylogenetics of soricid shrews (Mammalia) based on mitochondrial cytochrome *b* gene sequences: with special reference to the Soricinae. *J. Zool.* 270(1): 177-191.

Ohdachi, S. D., Iwasa, M. A., Nesterenko, V. A., Abe, H., Masuda, R. & Haberl, W. 2004. Molecular Phylogenetics of *Crocidura* Shrews (Insectivora) in East and Central Asia. *J. Mammal.* 85(3): 396-403.

Ohdachi, S. D., Kinoshita, G., Oda, S.-i., Motokawa, M., Jogahara, T., Arai, S., Nguyen, S. T., Suzuki, H., Katakura, K., Bawm, S., Min, M. Z., Thwe, T. L., Gamage, C. D., Hashim, R., Omar, H., Maryanto, I., Ghadirian, T., Ranorosoa, M. C., Moribe, J. & Tsuchiya, K. 2016. Intraspecific phylogeny of the house shrews, *Suncus murinus-S. montanus* species complex, based on the mitochondrial cytochrome *b* gene. *Mammal Study* 41(4): 229-238.

Omar, H., Adamson, E., Bhassu, S., Goodman, S., Soarimalala, V., Hashim, R. & Ruedi, M. 2011. Phylogenetic relationships of Malayan and Malagasy pygmy shrews of the genus *Suncus* (Soricomorpha: Soricidae) inferred from mitochondrial Cytochrome *b* gene sequences. *Raffles Bull. Zool.* 59: 237-243.

Omar, H., Hashim, R., Bhassu, S. & Ruedi, M. 2013. Morphological and genetic relationships of the *Crocidura monticola* species complex (Soricidae: Crocidurinae) in Sundaland. *Mammal. Biol.* 78: 446–454.

Sabuni, C., Aghová, T., Bryjová, A., Šumbera, R. & Bryja, J. 2018. Biogeographic implications of small mammals from Northern Highlands in Tanzania with first data from the volcanic Mount Kitumbeine. *Mammalia* 82(4): 360-372.

Schlegel, M., Ali, H. S., Stieger, N., Groschup, M. H., Wolf, R. & Ulrich, R. G. 2012. Molecular identification of small mammal species using novel *cytochrome b* gene-derived degenerated primers. *Biochem. Genet.* 50(5-6): 440-447.

Sheftel, B., Bannikova, A., Fang, Y., Demidova, T., Alexandrov, D. Y., Lebedev, V. & Sun, Y.-H. 2018. Notes on the Fauna, systematics, and ecology of small mammals in Southern Gansu, China. *Biol. Bul.* 45: 898-912.

Stanley, W. T., Hutterer, R., Giarla, T. C. & Esselstyn, J. A. 2015. Phylogeny, phylogeography and geographical variation in the *Crocidura monax* (Soricidae) species complex from the montane islands of Tanzania, with descriptions of three new species. *Zool. J. Linnean Soc.* 174(1): 185-215.

Stanley, W. T., Robbins, L. W., Malekani, J. M., Mbalitini, S. G., Migurimu, D. A., Mukinzi, J. C., Hulselmans, J., Prevot, V., Verheyen, E., Hutterer, R., Doty, J. B., Monroe, B. P., Nakazawa, Y. J., Braden, Z., Carroll, D., Peterhans, J. C., Bates, J. M. & Esselstyn, J. A. 2013. A new hero emerges: another exceptional mammalian spine and its potential adaptive significance. *Biol. Lett.* 9(5): 20130486.

Vogel, P., Vogel, V., Fumagalli, L., Kadjo, B., Kouadio, R. Y. & Dubey, S. 2014. Genetic identity of the critically endangered Wimmer's shrew *Crocidura wimmeri*. *Biol. J. Linn. Soc.* 111: 224–229.

Wang, W., Lin, X.-D., Guo, W.-P., Zhou, R.-H., Wang, M.-R., Wang, C.-Q., Ge, S., Mei, S.-H., Li, M.-H., Shi, M., Holmes, E. C. & Zhang, Y.-Z. 2015. Discovery, diversity and evolution of novel coronaviruses sampled from rodents in China. *Virology* 474: 19-27.

Willows-Munro, S. & Matthee, C. A. 2011. Exploring the diversity and molecular evolution of shrews (Family Soricidae) using mtDNA cytochrome *b* data. *Afr. Zool.* 46(2): 246-262.
